# Supplementary material for: POSS Engineering of Multifunctional Nanoplatforms for Chemo-Mild Photothermal Synergistic Therapy
Source: MDPI journal article supplement (doi:10.3390/ijms25021012), 2024-01-13
Supplement: s1 [file s1]

# POSS Engineering of Multifunctional Nanoplatforms for Chemo-Mild Photothermal Synergistic Therapy

## Supporting Information (6 pages)

|                                                                                            |    |
|--------------------------------------------------------------------------------------------|----|
| 1. <i>Synthetic routes of all compounds</i>                                                | S2 |
| 2. <i>The calculation of photothermal conversion efficiency for <b>POSS-SQ-DOX</b> NPs</i> | S2 |
| 3. <i>Cell culture</i>                                                                     | S3 |
| 4. <i>Animal model</i>                                                                     | S3 |
| 5. <i><sup>1</sup>H NMR and FTIR of all compounds</i>                                      | S4 |
| 6. <i>UV-Vis and fluorescence of <b>SQ-N</b></i>                                           | S5 |
| 7. <i>Contact angles of <b>POSS-SQ-DOX</b>, POSS-PEG, <b>SQ-N</b> and POSS-SH</i>          | S5 |
| 8. <i>Electron microscopic photographs of cell membrane disruption and cell death</i>      | S6 |

## 1. Synthetic routes of all compounds

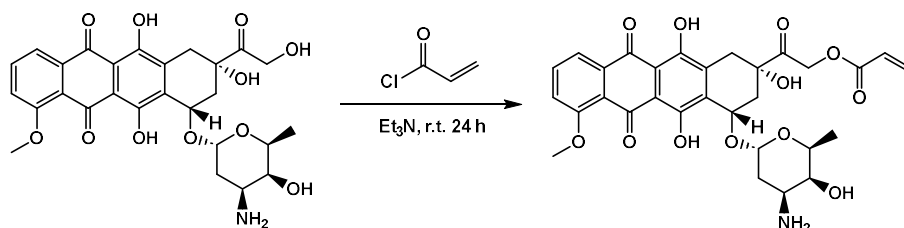

**Scheme S1** Synthetic routes of the **DOX-AC**.

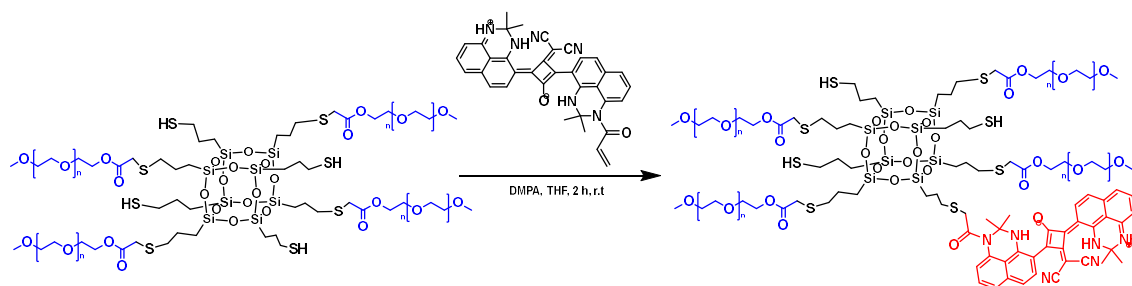

**Scheme S2** Synthetic routes of the **POSS-SQ**.

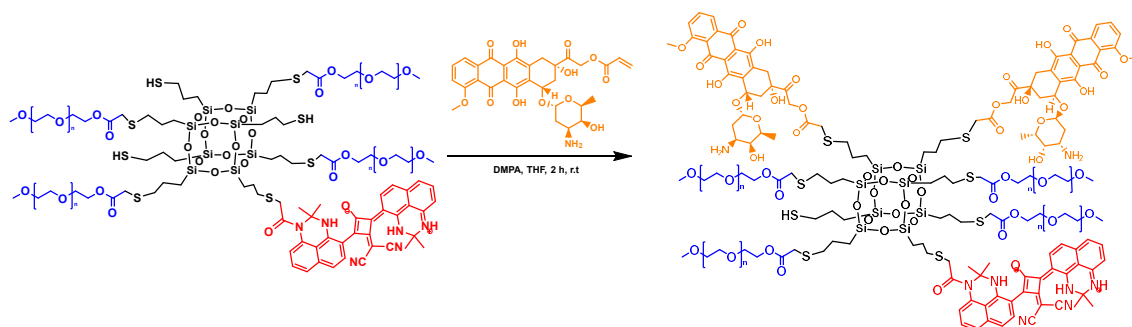

**Scheme S3** Synthetic routes of the **POSS-SQ-DOX**.

## 2. The calculation of photothermal conversion efficiency for **POSS-SQ-DOX** NPs

The photothermal conversion efficiency (PCE) of photothermal agents was calculated according to the following formula (1):

$$\eta = \frac{hS(T_{Max} - T_{Sur}) - Q_{Dis}}{I(1 - 10^{-A_{808}})} \quad (1)$$

where  $h$  is the heat transfer coefficient,  $S$  is the surface area of the quartz plate.  $T_{Max}$  (81.1 °C) and  $T_{Sur}$  (23.9 °C) are the maximum system and surrounding environment temperatures.  $I$  is the laser power (0.5 W/cm<sup>2</sup>), and  $A_{808}$  is the absorbance of the **POSS-SQ-DOX** NP solution at 808 nm (0.67).  $Q_{Dis}$  is the heat dissipated from the light absorbed using a solvent and container with cuvette cell-containing water.  $hS$  can be calculated using formula (2):

$$hS = \frac{m_D C_D}{\tau_s} \quad (2)$$

where  $m_D$  and  $C_D$  are the mass (0.1 g) and heat capacity (4.2 J/g °C) of water, respectively.  $\tau_s$  is the time constant of the sample system and can be calculated using formula (3):

$$t = -\tau_s \ln(\theta) \quad (3)$$

where  $\theta$  is introduced as a dimensionless parameter in formula (4):

$$\theta = \frac{T - T_{Sur}}{T_{Max} - T_{Sur}} \quad (4)$$

As a result,  $\tau_s$  was calculated to be 60.1 s according to formula (3); the photothermal conversion efficiency ( $\eta$ ) of the **POSS-SQ-DOX** NPs was determined to be 62.3%.

### 3. Cell culture

L929 and cervical cancer (HeLa) cell lines were cultured in Dulbecco's modified Eagle's medium (DMEM) containing 10% fetal bovine serum (FBS) and a 1% dual antibody (penicillin and streptomycin), which were then grown under humidified air containing 5% CO<sub>2</sub> at 37 °C.

### 4. Animal model

All the animal experiments in this work were carried out under the guidelines of the Shanghai Jiao Tong University Institutional Animal Care and Use Committee. To establish the HeLa tumor-bearing mouse model, HeLa cancer cells (approximately  $5 \times 10^6$  cells suspended in 100  $\mu$ L of PBS) were subcutaneously injected into the right flanks of mice. After about a week, the tumor volumes reached 120 mm<sup>3</sup>, and the mice were used for in vivo photothermal therapy studies subsequently, and various treatments were applied to the tumor sites.

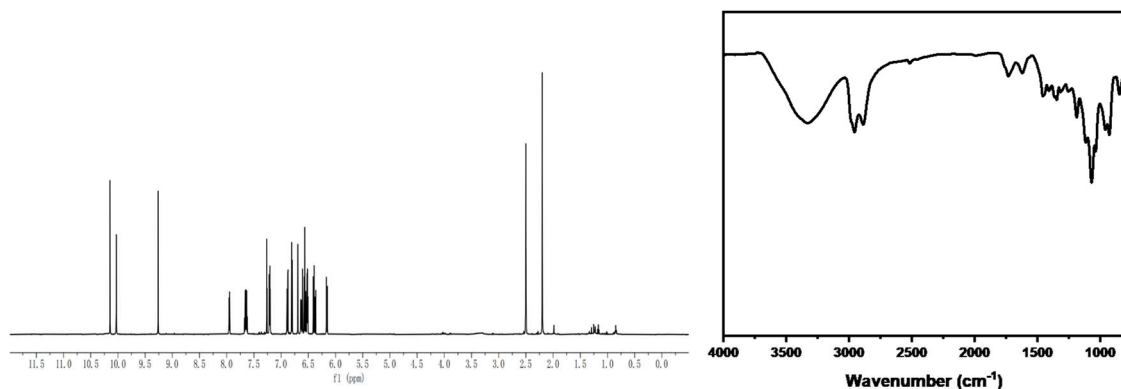

**Figure. S1** **a**  $^1\text{H}$  NMR spectrum (600 MHz, DMSO) and **b** FTIR of **DOX-AC**.

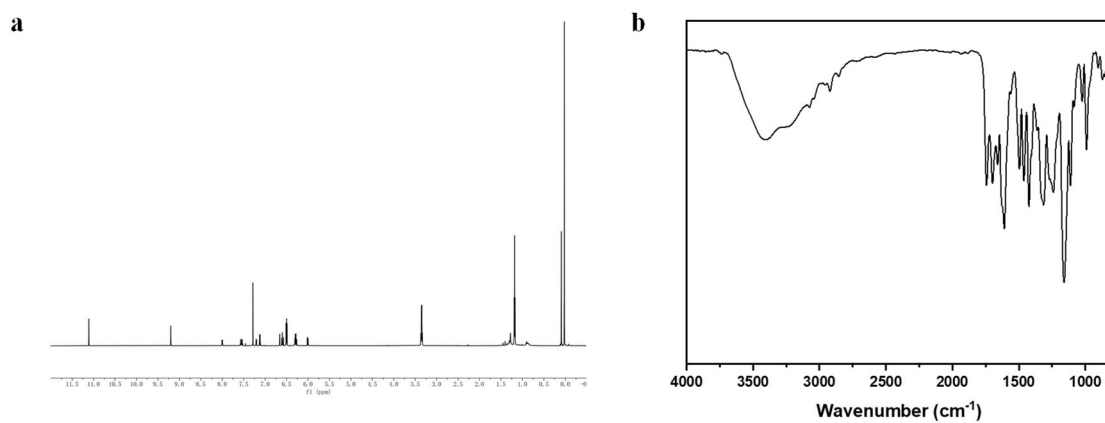

**Figure. S2** **a**  $^1\text{H}$  NMR spectrum (600 MHz, DMSO) and **b** FTIR of **POSS-SQ**.

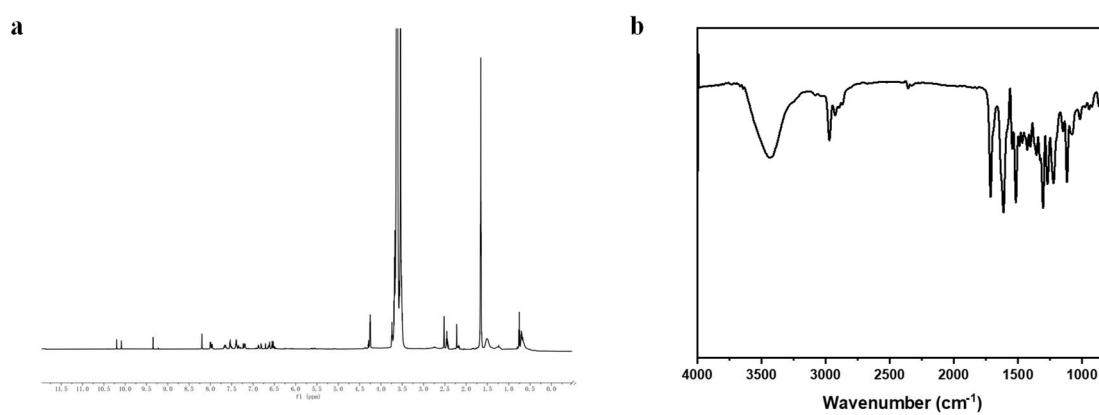

**Figure. S3** **a**  $^1\text{H}$  NMR spectrum (600 MHz, DMSO) and **b** FTIR of **POSS-SQ-DOX**.

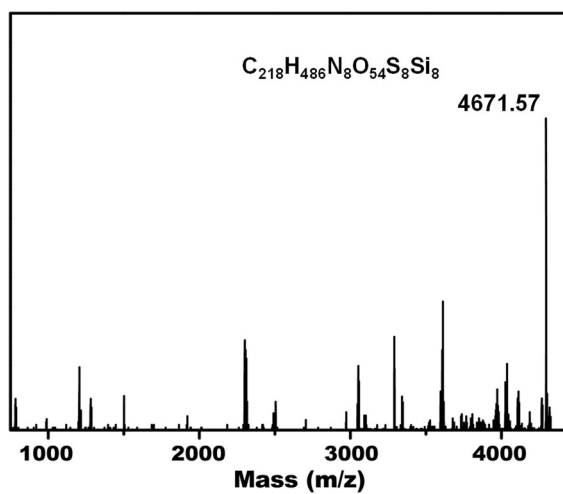

**Figure. S4** ESI-MS spectrum of **POSS-SQ-DOX**.

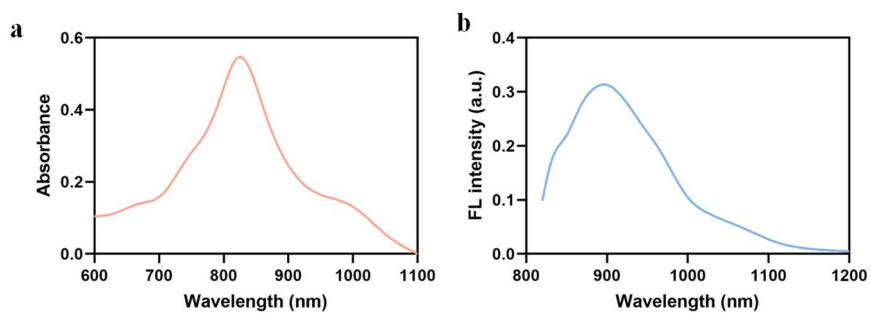

**Figure. S5** a) UV-vis absorption and b) fluorescence spectra of SQ-N (25 µg/mL) in aqueous solution

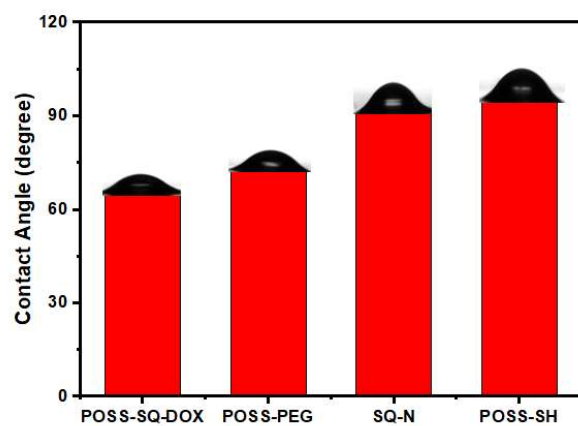

**Figure. S6** Contact angles of POSS-SQ-DOX NPs, POSS-PEG, SQ-N and POSS-SH.

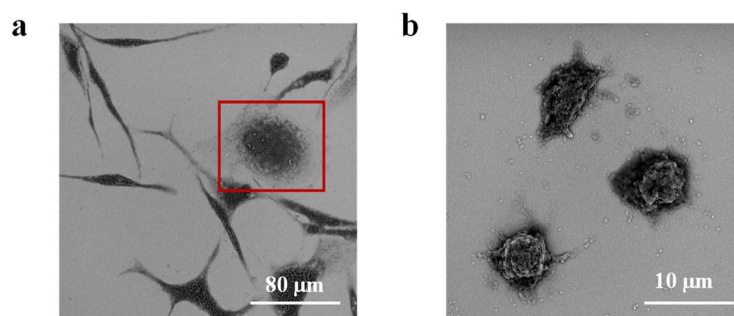

**Figure S7.** Electron microscopic photographs of a) cell membrane disruption and b) cell death.
